# Supplementary material for: Changes in patterns of age-related network connectivity are associated with risk for schizophrenia
Source: PubMed Central journal article supplement — Proc Natl Acad Sci U S A. 2023 Aug 1;120(32):e2221533120. doi: 10.1073/pnas.2221533120 (PMC10410767; doi:10.1073/pnas.2221533120), 2023-08-01
Supplement: pnas.2221533120.sapp2.pdf [file pnas.2221533120.sapp2.pdf]

## Group Author Details for

## Changes in patterns of age-related network connectivity are associated with risk for schizophrenia

Roberta Passiatore<sup>a,b,c</sup>, Linda A. Antonucci<sup>a</sup>, Thomas P. DeRamus<sup>b</sup>, Leonardo Fazio<sup>d</sup>, Giuseppe Stolfa<sup>a</sup>, Leonardo Sportelli<sup>a</sup>, Gianluca C. Kikidis<sup>a</sup>, Giuseppe Blasi<sup>a,e</sup>, Qiang Chen<sup>f</sup>, Juergen Dukart<sup>c,g</sup>, Aaron Goldman<sup>f</sup>, Venkata S. Mattay<sup>f,h</sup>, Teresa Popolizio<sup>i</sup>, Antonio Rampino<sup>a,e</sup>, Fabio Sambataro<sup>j</sup>, Pierluigi Selvaggi<sup>a,e</sup>, William Ulrich<sup>f</sup>, Apulian Network on Risk for Psychosis<sup>a,k,l,m,n,o</sup>, Daniel R. Weinberger<sup>f</sup>, Alessandro Bertolino<sup>a,e\*</sup>, Vince D. Calhoun<sup>b\*</sup>, Giulio Pergola<sup>a,f,p\*</sup>

<sup>a</sup> Department of Translational Biomedicine and Neuroscience – University of Bari Aldo Moro, Bari, IT.

<sup>b</sup> Tri-institutional Center for Translational Research in Neuroimaging and Data Science (TReNDS) – Georgia State University, Georgia Institute of Technology, and Emory University, Atlanta, GA, USA

<sup>c</sup> Institute of Neuroscience and Medicine, Brain & Behavior (INM-7), Research Centre Jülich, Jülich, DE

<sup>d</sup> Department of Medicine and Surgery - LUM Jean Monnet, Casamassima, IT

<sup>e</sup> Psychiatric Unit - University Hospital, Bari, IT

<sup>f</sup> Lieber Institute for Brain Development – Johns Hopkins Medical Campus, Baltimore, MD, USA

<sup>g</sup> Institute of Systems Neuroscience, Medical Faculty, Heinrich Heine University Düsseldorf, Düsseldorf, DE

<sup>h</sup> Department of Neurology and Radiology – Johns Hopkins Medical Campus, Baltimore, MD, USA

<sup>i</sup> Neuroradiology Unit - IRCCS Casa Sollievo della Sofferenza Hospital, S. Giovanni Rotondo, IT

<sup>j</sup> Section of Psychiatry, Department of Neuroscience - University of Padova, Padua, IT

<sup>k</sup> Department of Mental Health, ASL Foggia, Foggia, IT

<sup>l</sup> Department of Clinical and Experimental Medicine, University of Foggia, Foggia, IT

<sup>m</sup> Department of Mental Health, ASL Barletta-Andria-Trani, Andria, IT

<sup>n</sup> Department of Mental Health, ASL Bari, Bari, IT

<sup>o</sup> Department of Mental Health, ASL Brindisi, Brindisi, IT

<sup>p</sup> Department of Psychiatry and Behavioral Sciences, Johns Hopkins University School of Medicine, Baltimore, MD, USA

\*Please, address correspondence to:

Giulio Pergola

Address: Piazza Giulio Cesare, 11- 70121 Bari, Italy

Phone: +39 080 5478548 - E-mail: giulio.pergola@uniba.it

Vince D. Calhoun

Address: 55 Park Place - 30303 Atlanta, GA, USA

Phone: +1 505 514-5850 - E-mail: vcalhoun@gsu.edu

Alessandro Bertolino

Address: Piazza Giulio Cesare, 11 - 70121 Bari, Italy

Phone: +39 080 5478572 - E-mail: alessandro.bertolino@uniba.it

**Apulian Network on Risk for Psychosis** includes:

**Ileana Andriola** (Department of Translational Biomedicine and Neuroscience – University of Bari Aldo Moro, Bari, IT)

**Lucia Mare** (Department of Translational Biomedicine and Neuroscience – University of Bari Aldo Moro, Bari, IT)

**Nicolò Parente** (Department of Translational Biomedicine and Neuroscience – University of Bari Aldo Moro, Bari, IT)

**Alessandra Raio** (Department of Translational Biomedicine and Neuroscience – University of Bari Aldo Moro, Bari, IT)

**Veronica Debora Toro** (Department of Translational Biomedicine and Neuroscience – University of Bari Aldo Moro, Bari, IT)

**Mario Altamura** (Department of Mental Health, ASL Foggia, Foggia, IT; Department of Clinical and Experimental Medicine, University of Foggia, Foggia, IT)

**Marimar Castrigno** (Department of Mental Health, ASL Foggia, Foggia, IT)

**Melania Difino** (Department of Mental Health, ASL Foggia, Foggia, IT)

**Flora Brudaglio** (Department of Mental Health, ASL Barletta-Andria-Trani, Andria, IT)

**Domenico Sabino Savino** (Department of Mental Health, ASL Barletta-Andria-Trani, Andria, IT)

**Rossana Vista** (Department of Mental Health, ASL Barletta-Andria-Trani, Andria, IT)

**Angela Carofiglio** (Department of Mental Health, ASL Bari, Bari, IT)

**Barbara Gelao** (Department of Mental Health, ASL Bari, Bari, IT)

**Marina Mancini** (Department of Mental Health, ASL Bari, Bari, IT)

**Alessandro Saponaro** (Department of Mental Health, ASL Brindisi, Brindisi, IT)

**Anna Manzari** (Department of Mental Health, ASL Brindisi, Brindisi, IT)

**Domenico Suma** (Department of Mental Health, ASL Brindisi, Brindisi, IT)
